1 **Decadal trend of plankton community change and habitat shoaling in the Arctic gateway recorded**  
2 **by planktonic foraminifera**

3 Mattia Greco<sup>1, 2\*</sup>, Kirstin Werner<sup>3</sup>, Katarzyna Zamelczyk<sup>4</sup>, Tine L. Rasmussen<sup>4</sup>, and Michal Kucera<sup>1</sup>

4 <sup>1</sup> MARUM – Centre for Marine Environmental Sciences, Leobener Str. 8, 28359, Bremen, Germany;

5 [mkucera@marum.de](mailto:mkucera@marum.de)

6 <sup>2</sup> Institute of Oceanology, Polish Academy of Sciences, Sopot, Poland;

7 [mattia\\_greco@outlook.com](mailto:mattia_greco@outlook.com)

8 <sup>3</sup> Alfred Wegener Institute Helmholtz Centre for Polar and Marine Research, Bremerhaven, Germany;

9 [kirstin.werner@awi.de](mailto:kirstin.werner@awi.de)

10 <sup>4</sup>CAGE-Centre for Arctic Gas Hydrate, Environment, and Climate, UiT, Tromsø, Norway;

11 [kza002@post.uit.no](mailto:kza002@post.uit.no), [tine.rasmussen@uit.no](mailto:tine.rasmussen@uit.no)

12

13

14 \*corresponding author

15

16 **Keywords:** atlantification, plankton, foraminifera, marine calcifiers, Arctic, Fram Strait, climate change

## 17 **Abstract**

18 The Fram Strait plays a crucial role in regulating the heat and sea-ice dynamics in the Arctic. In response  
19 to the ongoing global warming, the marine biota of this Arctic gateway is experiencing significant  
20 changes with increasing advection of Atlantic species. The footprint of this “Atlantification” has been  
21 identified in isolated observations across the plankton community, but a systematic, multi-decadal  
22 perspective on how regional climate change facilitates the invasion of Atlantic species and affects the  
23 ecology of the resident species is lacking. Here we evaluate a series of 51 depth-resolved plankton  
24 profiles collected in the Fram Strait during seven surveys between 1985 and 2015, using planktonic  
25 foraminifera as a proxy for changes in both the pelagic community composition and species vertical  
26 habitat depth. The time series reveals a progressive shift towards more Atlantic species, occurring  
27 independently of changes in local environmental conditions. We conclude that this trend is reflecting  
28 higher production of the Atlantic species in the “source” region, from where they are advected into the  
29 Fram Strait. At the same time, we observe that the ongoing extensive sea-ice export from the Arctic and  
30 associated cooling-induced decline in density and habitat shoaling of the subpolar *Turborotalita*  
31 *quinqueloba*, whereas the resident *Neogloboquadrina pachyderma* persists. As a result, the planktonic  
32 foraminiferal community and vertical structure in the Fram Strait shifts to a new state, driven by both  
33 remote forcing of the Atlantic invaders and local climatic changes acting on the resident species. The  
34 strong summer export of Arctic sea ice has so far buffered larger plankton transformation. We predict  
35 that if the sea-ice export will decrease, the Arctic gateway will experience rapid restructuring of the  
36 pelagic community, even in the absence of further warming. Such a large change in the gateway region  
37 will likely propagate into the Arctic proper.

38

## 39 **Introduction**

40 Over the last decades, the Arctic has experienced warming and sea ice decline of “unprecedented”  
41 extent, shifting to a climatic state not experienced throughout the 20<sup>th</sup> Century (Box et al., 2019). A key  
42 region for the heat budget and sea-ice dynamics of the Arctic is the Fram Strait. This narrow passage  
43 constitutes the only deep-water connection with the Atlantic Ocean, facilitating the inflow of a large  
44 portion of the warm and saline Atlantic Water, the export of sea ice from the Arctic (Beszczynska-  
45 Möller et al., 2012), and exchange of marine biota between the polar Arctic Mediterranean and the  
46 subarctic North Atlantic (Bluhm et al., 2015; Kosobokova & Hirche, 2009; Wassmann et al., 2015). The  
47 Atlantic Water (AW) is transported through the eastern part of the strait by the West Spitsbergen Current  
48 (WSC), while in the western part, the East Greenland Current (EGC) carries polar water and sea ice  
49 from the Arctic Ocean and Nordic Seas to the south (Fig.1). The AW inflow to the Arctic has warmed  
50 over the last decades (Beszczynska-Möller et al., 2012; Polyakov et al., 2012; Wassmann et al., 2015)  
51 and is regarded as one of the main drivers of the current changes in the Arctic marine environment  
52 (Onarheim et al., 2014).

53 The apparent increase in the advection of AW and the resulting changes in the Arctic Ocean are reflected  
54 in the “Atlantification” of the marine community in the Fram Strait (Andrews et al., 2018; Gluchowska  
55 et al., 2016; Kraft et al., 2013; Schröter et al., 2019). A long-term record of planktonic foraminiferal  
56 shells in a marine sediment core from the Fram Strait indicates that the recent changes are unparalleled  
57 over the last two millennia (Spielhagen et al., 2011). The ongoing Atlantification of the Arctic gateway  
58 contrasts with the changes in the physical environment of the upper ocean in the region. Unlike the rest  
59 of the Arctic realm, in the summers between 1985 and 2015, the Fram Strait has been cooling at the  
60 surface (~ 0.5 °C), and sea ice has expanded along the east coast of Greenland and Svalbard (Fig. 1).  
61 This seemingly counterintuitive trend is a reflection of the increasing reduction in summer sea ice in the  
62 Arctic and the associated increased export of Arctic sea ice into the Greenland Sea (Wang et al., 2019).  
63 Net changes in sea surface temperatures (SST) in the Fram Strait are therefore the result of the combined  
64 effect of increasing advection and warming of northward-flowing AW and increased sea-ice export in  
65 the EGC flowing southward. The higher export of Arctic sea ice and its melting in the Greenland Sea  
66 also contribute to a large-scale surface freshening, which suppresses oceanic mixing and facilitates  
67 cooling of the surface waters (Kwok et al., 2005) that are overlying the warm Atlantic inflow in the  
68 subsurface.

69 Thus, the environmental conditions in the Fram Strait, taken alone, should not facilitate Atlantification  
70 of the marine biota. Indeed, the observed increase in abundance of subpolar species and associated  
71 community changes have been interpreted as a consequence of warming in the North Atlantic “source”  
72 region and intensification of the AW inflow carrying the subpolar biota into the Fram Strait (Wassmann  
73 et al., 2015). In this scenario, the increasing proportion of Atlantic biota should occur independently of  
74 the local conditions in the Fram Strait and the Atlantification process should be associated with a re-  
75 arrangement of the vertical structure of the pelagic communities.

76 Accurate investigation of these dynamics are missing due to the lack of long-term time series on  
77 plankton distribution patterns available from the region (Dornelas et al., 2018). Furthermore, research  
78 on zooplankton response to climate change, and foraminifera in particular, rarely include an assessment  
79 of the effects on the vertical distribution of the marine species community (Jonkers et al., 2021; Jorda et  
80 al., 2020). Here, we analyse three decades of changes in population structure and vertical distribution of  
81 planktonic foraminifera, a distinctive group of Arctic unicellular calcareous zooplankton, in the Fram  
82 Strait recorded by 51 species-resolved vertical profiles of standing stocks sampled between 1985 and  
83 2015. Planktonic foraminifera species distribution is controlled by temperature (Bé & Tolderlund, 1971;  
84 Fenton et al., 2016; Morey et al., 2005), and they show distinct depth habitats, which vary with changing  
85 environmental conditions (Greco et al., 2019; Rebotim et al., 2017) and the sedimentary record indicates  
86 that foraminifera are sensitive indicators of climate change since the preindustrial era (Spielhagen et al.,  
87 2011; Jonkers et al., 2019), making them ideal sentinels of Fram Strait Atlantification and changes in  
88 vertical habitat structure. To this end, we combined data from repeated foraminiferal surveys in the Fram  
89 Strait with in-situ and regional environmental descriptors to assess the extent and environmental

90 determinants of recent changes in (i) planktonic foraminiferal community composition, (ii) species  
91 standing stocks and (iii) shifts in vertical distribution of species.

## 92 **Material and Methods**

### 93 *Biological data*

94 Over the last four decades, the plankton community of the Fram Strait has been sampled regularly with  
95 replicate vertical profiles available for most sampling years. Among the collected zooplankton,  
96 planktonic foraminifera have been the most frequently quantified and reported at species level, allowing  
97 us to compile a dataset of five surveys of planktonic foraminifera repeated at virtually the same location  
98 and same time of year in the Fram Strait between 1985 and 2011 containing a total of 45 vertical profiles.  
99 In order to extend the length of the time series, we generated new data from one profile taken in July  
100 2014 and a survey with five profiles sampled in July 2015. In 2014, planktonic foraminifera were  
101 sampled from three different depth intervals in the upper water column (0–50 m, 50–200 m, and 200–  
102 600 m) by the means of a WP2 net with aperture 0.25 m<sup>2</sup> and mesh size of 90 µm during an  
103 oceanographic cruise with *R/V Helmer Hanssen*. The following year, sampling was carried out on the  
104 *R/V Polarstern* using a multiple closing plankton net (Hydro-Bios, Kiel) with an opening of 0.25 m<sup>2</sup> and  
105 equipped with 5 nets each with a mesh size of 55 µm.

106 Samples from both expeditions were wet-sieved through 250 and 63 µm sieves and stained with Rose  
107 Bengal/ethanol mixture after collection to facilitate the distinction between cytoplasm-bearing and  
108 empty shells. The samples were processed at the University of Bremen and at UiT the Arctic University  
109 of Norway in Tromsø, where planktonic foraminifera were picked under a binocular microscope and  
110 air-dried. All specimens in the fraction above 63 µm were counted and identified to species level  
111 following the taxonomy of Brummer and Kroon (1988) and Hemleben (1989). Concentrations of the  
112 resident species (*Neogloboquadrina pachyderma* and *Turborotalita quinqueloba*) and of the Atlantic  
113 species (*Globigerina glutinata*, *Globigerina bulloides*, *Neogloboquadrina incompta*, *Globigerinita*  
114 *uvula*, and *Orcadia ridelii*) were derived from counts by using the volume of filtered water determined  
115 from the product of towed interval height and the net opening.

116 The new data and the literature data had to be first harmonised to the same taxonomy. As a result, counts  
117 of *N. pachyderma* and the Atlantic species from the ARK III/3 cruise could not be used in the analyses  
118 due to the different taxonomical resolution of the original study (Carstens et al., 1997). In their paper,  
119 the authors did not distinguish between *N. pachyderma* and *N. incompta*, previously considered  
120 ecophenotypic variants of the same species, but now known to be genetically distinct forms (Darling et  
121 al., 2006). Only data on the polar species *T. quinqueloba* collected during the same expedition could be  
122 included in the analyses. Because of their consistently low density and variable species composition, the  
123 concentrations of all non-resident (Atlantic) species were lumped into one category for the downstream  
124 analyses. For samples collected in 2008, the proportion of the Atlantic species was assumed to be 2%  
125 of the total assemblage as stated by the authors of the original study (Manno & Pavlov, 2014). Because

126 of the taxonomic lumping, the vertical habitat of the Atlantic species could not be evaluated. Since the  
127 distinction between cytoplasm-bearing and empty shells has not been done consistently, the analysis is  
128 based on the concentration of all shells. Greco et al. (2019) have shown that this treatment causes a  
129 slight but consistent overestimation of the vertical habitat depth, but since the vast majority of the  
130 collected specimens in the plankton are cytoplasm-bearing, the effect on standing stock estimates is  
131 likely negligible. Further, the different surveys have used different vertical sampling schemes and  
132 resolutions. Therefore, the individual vertical density profiles were converted to a common vertical  
133 scheme resolving standing stock at three depths (0–50 m, 50–100 m, 100–200 m) using a custom script  
134 in R (R Core Team, 2017). This scheme was chosen to avoid extrapolation and reflects the most shared  
135 position of depth-interval boundaries among the sampling schemes. We derived total species abundance  
136 as the sum of the concentrations within the different intervals. For the two polar species, *N. pachyderma*  
137 and *T. quinqueloba*, the depth habitat was calculated as in Greco et al. (2019).

### 138 *Environmental parameters*

139 The habitat of planktonic foraminifera reflects the vertical structure of physical and biological properties  
140 of the surface ocean layer. Therefore, next to the consideration of the temporal trends, to understand  
141 why population densities, species composition and vertical habitat have been shifting, we have tested  
142 models explaining the observed variability with physical properties of the environment. In Arctic polar  
143 waters, the main parameter affecting planktonic foraminiferal species composition appears to be  
144 temperature (Jonkers et al., 2019; Morey et al., 2005) in combination with sea-ice concentration  
145 (Carstens et al., 1997; Pados & Spielhagen, 2014). Additionally, in the Fram Strait an important  
146 parameter is also the depth of the Atlantic layer (Pados et al., 2015; Simstich et al., 2003). In contrast,  
147 salinity, within the range of typical open marine conditions, has been shown not to affect planktonic  
148 foraminifera (Greco et al., 2019).

149 In-situ temperature profiles were retrieved from CTD data from the respective expeditions. Data  
150 deposited in PANGAEA were accessed using the R package “pangaeR” (version 08.2) (Simpson &  
151 Chamberlain, 2018). For nine stations from the iAOOS and HH14 cruises, CTD data were obtained from  
152 the original investigators. The CTD temperature profiles were used to extract Sea Surface Temperature  
153 (SST), here defined as the average temperature in the uppermost 6 meters from the sea surface, and the  
154 minimum depth of the Atlantic Water layer (AWz), defined as the depth where temperature rises above  
155 2 °C (Beszczynska-Möller et al., 2012). As no CTD data were collected during the ARK III/3 cruise  
156 (Carstens et al., 1997), for these stations we extracted the SST and AWz from the NOAA Optimum  
157 Interpolation Sea Surface Temperature V2 [weekly resolution] (Reynolds et al., 2002) and the Hadley  
158 Centre EN4 dataset (Good et al., 2013), respectively. For all stations, in situ sea-ice concentration and  
159 the distance from the ice margin at the time of sampling were extracted from 25 km×25 km resolution  
160 passive microwave satellite raster imagery obtained from the Sea Ice Index Version 3.0 product of the  
161 National Snow and Ice Data Centre (Fetterer et al., 2017) using a custom script in R.

162 The foraminiferal assemblage captured in the net is the result of growth over several weeks (Carstens  
163 & Wefer, 1992). To a certain degree, the observed composition thus reflects processes acting  
164 throughout the habitat traversed by the plankton before being intercepted by the net. To account for the  
165 effect of these processes, next to the in-situ parameters, we also analyse two descriptors of the overall  
166 oceanographic state of the sampling area (spatial polygon including all the sampling locations present  
167 in our compilation) at the time of sampling. These include the average SST of the sampling area  
168 derived from the NOAA Optimum Interpolation Sea Surface Temperature V2 (Reynolds et al., 2002)  
169 and the average sea-ice extent of the sampling area extracted from the Sea Ice Index Version 3.0  
170 (Fetterer et al., 2017). Data on the projected Arctic sea-ice extent between 2010 and 2090 relative to  
171 the month of August under two climate scenarios (RCP 4.5 and RCP 8.5) were obtained from the  
172 Climate data store (<https://cds.climate.copernicus.eu/>). The projected Arctic sea ice coverage is  
173 derived from model simulations presented in Khon et al. (2017).

174 In addition to the physical environment, the foraminiferal population also likely reflects the trophic  
175 structure of their habitat. This is often highly correlated with the physical parameters of the environment  
176 (sea ice extent, distance from sea-ice edge), but could also act independently. Unfortunately, neither in-  
177 situ observations, nor satellite image data are available throughout the sampling period to generate  
178 representative and robust estimates of productivity.

### 179 *Statistical analyses*

180 We used the obtained dataset to investigate the effect of the environmental parameters and time (i.e.,  
181 sampling year, since all years the sampling took place in summer) on the composition, total abundance,  
182 density, and depth habitat of planktonic foraminiferal species in the Fram Strait. First, we had to rule  
183 out the potential influence of the longitudinal gradient of physical properties in the Fram Strait (Fig. 1)  
184 on the monitored parameters. Since in most years, the geographical extent of the sampling straddled this  
185 gradient, the presence of different hydrographic regimes in the east and in the west Fram Strait (WSC  
186 and EGC respectively) could potentially be the dominant factor influencing the planktonic foraminifera  
187 community. To test the effect of the longitudinal gradient, we performed a hierarchical cluster analysis  
188 using the unweighted pair group method with arithmetic mean (UPGMA) based on the Bray–Curtis  
189 dissimilarity index on species density data using the *hclust* function in the package “vegan” (version  
190 2.5-6) (Oksanen et al., 2018) in R and observed the clustering of sample sites assigned to the two  
191 hydrographic regimes in the region defined as in Fadeev et al. (2018). This analysis revealed no  
192 preferential clustering of samples according to the region (Fig. 1b), indicating that the observed  
193 variability is due to factors other than the sampling location.

194 Changes in the community structure of planktonic foraminifera were then analysed using a multivariate  
195 approach. We used nonmetric multidimensional scaling (NMDS) to visualize the similarities of  
196 assemblages observed across the stations using the *metaMDS* function from the R package “vegan”  
197 (version 2.5-6) (Oksanen et al., 2018). For the NMDS, data by Carstens (1997) were not included in

198 order to eliminate potential biases due to the taxonomic ambiguity in the counts (*N. pachyderma* and *N.*  
199 *incompta* not distinguished, see above). The obtained ordination was used to assess the individual  
200 effects of the tested environmental variables on the foraminiferal community by performing BIOENV  
201 analysis (Clarke & Ainsworth, 1993). This test allows the identification of variables that best explain  
202 the variance in the biological community by calculating a correlation coefficient that is then subjected  
203 to a permutation test to determine its significance. Prior to this step, we checked for the presence of  
204 collinearity between the environmental variables using the variance inflation factor (VIF) with the  
205 *vifstep* function from the R package “usdm” (version 1.1-18). The function calculates the VIF for a set  
206 of variables and excludes the highly correlated variables (VIF > 5) (Fenton et al., 2016) from the set  
207 through a stepwise procedure. The remaining environmental variables were included in the BIOENV  
208 analysis using the *envfit* function from the R package “vegan” with 999 permutations.

209 Next, generalized linear models (GLM) were applied to assess the effects of time and environmental  
210 drivers on the individual density of *N. pachyderma*, *T. quinqueloba* and of the Atlantic species. As we  
211 analysed count data, we used the *floor* function in R to derive discrete values from the total  
212 concentrations of the three taxonomic groups as a prior step (Zuur et al., 2007) and explored the  
213 relationship with the potential predictors with bivariate GLM using the *glm* function in R indicating a  
214 quasi-poisson error distribution with log as link function. For the three groups, *N. pachyderma*, *T.*  
215 *quinqueloba* and Atlantic species, the total concentration (dependent variable) was regressed against the  
216 sampling year (time), longitude (as a proxy for the two hydrographic regimes), SST, average SST of the  
217 sampling area, ice-concentration, distance from ice-margin, AWz, and average sea-ice extent of the  
218 sampling area as independent variables. Trait variance explained by individual parameters was  
219 calculated using pseudo-R<sup>2</sup> for Poisson GLMs as 100\*(model null deviance- model deviance)/model  
220 null deviance (Dobson, 2002). Where more than one predictor displayed a significant effect on the  
221 density, VIF was calculated among the variable, variables identified as causing variance inflation were  
222 dropped, and the GLMs were re-applied allowing for interactions among the remaining variables.

223 The relationship between environmental and temporal controllers on the depth habitat (DH) of the  
224 resident species *N. pachyderma* and *T. quinqueloba* were investigated through bivariate correlation  
225 (Pearson *r*). Square root transformation was performed on *T. quinqueloba* data to obtain symmetric  
226 distribution. Multiple linear models were applied to species depth habitat and variables that displayed a  
227 significant correlation. The normality of the residuals was checked after the linear model was applied  
228 (Zuur et al., 2009). As for the density, in case of more than one predictor displayed a significant  
229 correlation with DH, we proceeded to calculate the VIF between the concurrent variables and re-applied  
230 the linear model for the remaining variables allowing interactions. Results from models that explained  
231 most of the variance (higher pseudo-R<sup>2</sup> and R<sup>2</sup>) are presented and discussed.

### 232 **5.3 Results**

#### 233 *Species composition*

234 All samples contained an assemblage typical for the polar environment of the Fram Strait, dominated  
235 by *N. pachyderma*, which represented 56% of the total assemblage in our compilation. Not all the  
236 stations presented the same species proportions: *T. quinqueloba* was the most abundant species in 17  
237 stations. The abundance of the Atlantic species also varied greatly in our compilation ranging from total  
238 absence to 27 % of the total assemblage in the samples taken in 2014. The BIOENV analysis revealed  
239 that three of the tested variables correlate significantly with the obtained ordination without variance  
240 inflation: Year ( $R^2 = 0.46$ , p-value = 0.001), SST of the sampling area ( $R^2 = 0.36$ , p-value = 0.008), and  
241 distance from the sea-ice margin ( $R^2 = 0.23$ , p-value = 0.023) (Fig. 3 and Fig. 4b). This indicates that  
242 the assemblage composition has changed through time and that at least part of the change can be  
243 attributed to changes in the physical environment.

#### 244 *Species density*

245 The time series of population density reveal a considerable amount of variance within each sampling  
246 period, with years with unusually high density for some species, and an apparent trend of increasing  
247 density of Atlantic species (Fig. 2a). Potential predictors of the observed trends in population density of  
248 the three taxonomic groups were thus investigated using generalised linear model and the results are  
249 summarised in Table 1 and in Figure 4. The two best predictors of the density of *N. pachyderma* were  
250 longitude (Pseudo- $R^2 = 0.18$ , p-value = 0.01) and the SST of the sampling area (Pseudo- $R^2 = 0.14$ , p-  
251 value = 0.002), both showing a negative relationship with the concentration of *N. pachyderma* (Fig 4a).  
252 The final model including the summing effects of the two predictors explained 38% of the total variance.  
253 The SST of the sampling area was also negatively associated with the density of *T. quinqueloba* (Pseudo-  
254  $R^2 = 0.14$ , p-value = 0.002), but the variable was removed due to high collinearity (VIF > 5). The  
255 remaining two predictors, year of sampling and sea-ice extent had a VIF < 2 and were included in the  
256 final model along with their interactions explaining 51% of the observed variance. Only the year of  
257 sampling alone was identified as a significant predictor of the total density of the Atlantic species  
258 (Pseudo- $R^2 = 0.17$ , p-value = 0.02).

#### 259 *Depth habitat*

260 The two species *N. pachyderma* and *T. quinqueloba* displayed a similar vertical distribution in the water  
261 column with average living depths 37–140 m and 44–142 m, respectively (Fig.2b). Factors controlling  
262 the variability in the observed depth habitat of the two species were investigated by a linear model. This  
263 revealed that sea-ice extent in the sampling area alone was the only significant predictor of the depth  
264 habitat of *N. pachyderma* (Adj.  $R^2 = 0.091$ , p-value = 0.03). In contrast, all the variables investigated  
265 showed a significant correlation with the variability of the depth habitat of *T. quinqueloba* (Table 1) and  
266 only the overall SST in the area had to be excluded because of variance inflation. A combined linear  
267 model with interactions still identified three variables as significantly and independently affecting the  
268 depth habitat of the species. Longitude, sea-ice extent and sampling year explain together 47 % of the  
269 observed variance in the depth habitat of *T. quinqueloba*.



## 270 Discussion

271 The results of the BIOENV analysis indicate a steady rise in the concentration of Atlantic species  
272 throughout the observational period (Fig. 3). The same pattern emerged from the GLM (Table 1, Fig. 4)  
273 with the year of sampling significantly correlated with population density of the Atlantic species and  
274 explaining 18% of the variance in our observations. The declining trend in SST in the Fram Strait  
275 suggests that the observed increase in the abundance of Atlantic species in the region cannot be the result  
276 of habitat tracking. Since none of the tested environmental factors was a significant predictor of the  
277 density of Atlantic species in the region either, their rising abundance must reflect changes in the  
278 “source” region in the Nordic Seas from where the species are advected northward with the AW. An  
279 increase in density or a change in phenology of these species in the Nordic Seas would result in higher  
280 density in the Fram Strait region even without changes in the intensity of AW inflow. Indeed, evidence  
281 from moorings has shown that the variability observed in the advection of “Atlantic” copepods in the  
282 Fram Strait reflects their phenology and not the intensity of the AW inflow (Basedow et al., 2018). The  
283 invoked changes in Atlantic species population dynamics in the “source” region is consistent with the  
284 increasing abundance of planktonic foraminifera in the North Atlantic recorded in Continuous Plankton  
285 Recorder (CPR) observations (Beaugrand et al., 2013). Importantly, a recent investigation based on  
286 satellite-derived altimetry observations showed that an increase in surface velocity of the North Atlantic  
287 Current from 1993 to 2016, resulted in a northward shift in the spatial distribution of the coccolithophore  
288 *Emiliana huxleyi* (Oziel et al., 2020).

289 In contrast to the rising abundance of the Atlantic expatriates, the subpolar resident species *T.*  
290 *quinqueloba* shows decreasing population density through time (Figures 2, 3 and 4) leading to lower  
291 proportions in the planktonic foraminiferal community (Fig. 3). Contrary to the non-resident, advected  
292 Atlantic species, the Fram Strait region is the primary habitat of *T. quinqueloba* (Schiebel et al., 2017)  
293 and its abundance in the Fram Strait is not reflecting AW inflow. However, this species is known to  
294 prefer warmer, subpolar, waters and is largely absent from the Arctic proper (Carstens et al., 1997;  
295 Manno & Pavlov, 2014; Pados & Spielhagen, 2014; Volkmann, 2000). Therefore, the increasing sea-  
296 ice export and decreasing SST in the Fram Strait make the region less suitable for this species. Indeed,  
297 next to time, a significant component of the variability in the abundance of this species can be explained  
298 by local properties in the Fram Strait, in a direction consistent with the above hypothesis: the species is  
299 less abundant where/when sea-ice cover is more extensive (Table 1, Fig. 4). Since the local conditions  
300 in the Fram Strait are highly variable, a single observation like that by Manno & Pavlov (2014), would  
301 easily appear to indicate an opposing trend, highlighting the necessity and merit of the long-term  
302 replicated data series presented in this study.

303 Thus, the changing abundance of *T. quinqueloba* appears to be consistent with habitat tracking,  
304 responding to the temporal evolution of local conditions in the Fram Strait. This conclusion is further  
305 supported by the observed concomitant shallowing of the vertical habitat of this species through time  
306 (Fig. 4), which is reflecting the shallower habitat of the species in the presence of sea ice (Table 1).

307 Previous observations on *T. quinqueloba* in the Fram Strait also showed shallower habitat in the presence  
308 of sea ice (Carstens et al., 1997; Volkmann, 2000). The current increase in sea ice in the Fram Strait  
309 thus acts to reduce the population density of this species and shoal its vertical habitat, both occurring in  
310 the direction consistent with habitat tracking.

311 Consistently with the increasing sea-ice extent and decreasing temperature, the habitat of the Fram Strait  
312 remains suitable for the polar species *N. pachyderma*, which shows no significant temporal trend in its  
313 density or vertical habitat (Fig. 2). Instead, the variability in these parameters can be explained by local  
314 parameters with higher density and shallower habitat occurring when and where the sea-ice cover is  
315 more extensive (Table 1, Fig. 4). Peaks in *N. pachyderma* density in cold polar waters were observed in  
316 previous studies (Manno & Pavlov, 2014; Volkmann, 2000) as well as its high occurrence along the sea-  
317 ice margin considered, where higher primary production by diatoms represents a major food source for  
318 this species (Greco et al., 2021). The habitat shoaling towards sea ice is entirely consistent with a recent  
319 analysis of factors affecting the vertical habitat of this species (Greco et al., 2019).

320 Our in-situ, vertically, resolved observations of three decades of plankton change in the Fram Strait  
321 provide direct evidence that trends in population density are associated with significant shifts in the  
322 vertical position of the involved species. This observation is significant, as it could not have been derived  
323 from CPR or sediment trap devices or remote sensing of the ocean surface. The existence of systematic  
324 vertical shifts in plankton populations has significant consequences for biogeochemical cycling in the  
325 upper ocean (Bianchi et al., 2013). In addition, the changes in plankton vertical habitat in the Fram Strait  
326 may affect species interactions with other resident or immigrant Atlantic species, as vertical niche  
327 partitioning among closely related species of zooplankton is an important mechanism of adaptation to  
328 the Arctic environment (Kosobokova et al., 2011). In light of these observations, we postulate that the  
329 assessment of future changes in the marine biota in the Arctic gateway must also consider the vertical  
330 dimension of the pelagic habitat (Gluchowska et al., 2017; Jorda et al., 2020; Knutsen et al., 2017;  
331 Kosobokova et al., 2011).

332 Overall, we thus show that plankton in the Arctic gateway is assuming an unusual composition, with the  
333 resident species shifting towards more polar taxa and shallower habitat, tracking local environmental  
334 change, being confronted with increasing abundance of Atlantic expatriates, rising due to processes  
335 favouring their growth in the Nordic Seas. Since there is no reason to believe that this observation based  
336 on planktonic foraminifera should not apply to other plankton groups, this shift in community  
337 composition likely alters the diversity of planktonic communities, in turn affecting the established food  
338 webs of the involved species (Griffith et al., 2019; Kortsch et al., 2015). At present, the increased sea-  
339 ice export in the Fram Strait compensates the overall regional warming in the Arctic, muting the changes  
340 in plankton communities in the region. Indeed, in the adjacent Barents Sea, in absence of sea-ice export,  
341 the Atlantification of the foraminiferal community appears stronger (Ofstad et al., 2020), likely further  
342 enhanced by import of nutrients that promotes phytoplankton production (Lewis et al., 2020). This

343 means that once the ice export in the Fram Strait ceases to be fuelled by the increasing Arctic sea ice  
344 reduction (Årthun et al., 2021; Guarino et al., 2020), the planktonic community will likely abruptly shift  
345 to a completely different state with more Atlantic and more non-sea-ice species, possibly impacting the  
346 carbon export of the region (Anglada-Ortiz et al., 2021). Observational data of sea-ice extent and future  
347 predictions plotted in Figure 1d show that, in the Fram Strait, the trend towards an increase in sea-ice  
348 export seems to have already reached its maximum. The projections point at a further reduction showing  
349 that by the year 2050, the sea-ice extent in the area will attain values below the variability of the  
350 observational era in the last four decades (Fig. 1d). Thus, this would be the time when we can expect  
351 the regime shift to occur. Acting as the gateway to the Arctic, this rapid shift in the Fram Strait will  
352 likely propagate into the Arctic proper.

### 353 **Data availability**

354

355 All new data on which this study is based will be deposited on the public repository PANGAEA. The  
356 data as used in this study, including the environmental data and biological data sources, are available  
357 on Zenodo (<https://doi.org/10.5281/zenodo.5266464>).

358

### 359 **Acknowledgements**

360

361 The masters and crews of the *R/V Polarstern* and *R/V Helmer Hanssen* are gratefully acknowledged for  
362 support of the work during the PS93 and HH/14 cruises. Sampling during the PS93.1/ARK-XXIX/2.1  
363 cruise was supported by the Byrd Polar and Climate Research Center, Columbus, Ohio, United States  
364 and the National Science Foundation Paleo Perspectives on Climate Change (P2C2) program #1404370.  
365 The CAGE 14.4 (HH/14) was supported by the Research Council of Norway through the project Effects  
366 of Ocean Chemistry Changes on Planktic Foraminifera in the Fram Strait: Ocean Acidification from  
367 Natural to Anthropogenic Changes, (project no. 216538) and the Centre for Arctic Gas Hydrate,  
368 Environment and Climate, UiT (project no. 223259). This research has been supported by the Deutsche  
369 Forschungsgemeinschaft (DFG) through the International Research Training Group “Processes and  
370 impacts of climate change in the North Atlantic Ocean and the Canadian Arctic” (IRTG 1904 ArcTrain).

371

372

### 373 **References**

374

375 Andrews, A., Bhat, S., & Lynghammar, A. (2018). Boreal marine fauna from the Barents Sea disperse  
376 to Arctic Northeast Greenland. *Scientific Reports*, 9(5799), 1–8. <https://doi.org/10.1101/394346>

- 377 Anglada-Ortiz, G., Zamelczyk, K., Meilland, J., Ziveri, P., Chierici, M., Fransson, A., & Rasmussen,  
378 T. L. (2021). Planktic Foraminiferal and Pteropod Contributions to Carbon Dynamics in the  
379 Arctic Ocean (North Svalbard Margin). *Frontiers in Marine Science*, 8(June).  
380 <https://doi.org/10.3389/fmars.2021.661158>
- 381 Årthun, M., Onarheim, I. H., Dörr, J., & Eldevik, T. (2021). The Seasonal and Regional Transition to  
382 an Ice-Free Arctic. *Geophysical Research Letters*, 48(1). <https://doi.org/10.1029/2020gl090825>
- 383 Basedow, S. L., Sundfjord, A., von Appen, W. J., Halvorsen, E., Kwasniewski, S., & Reigstad, M.  
384 (2018). Seasonal variation in transport of Zooplankton Into the Arctic basin through the Atlantic  
385 Gateway, Fram Strait. *Frontiers in Marine Science*, 5(JUN), 1–22.  
386 <https://doi.org/10.3389/fmars.2018.00194>
- 387 Bé, A., & Tolderlund, D. S. (1971). Distribution and ecology of living planktonic foraminifera in  
388 surface waters of the Atlantic and Indian Oceans. In *The Micropaleontology of Oceans* (pp. 105–  
389 149). Cambridge University Press.
- 390 Beaugrand, G., McQuatters-Gollop, A., Edwards, M., & Goberville, E. (2013). Long-term responses  
391 of North Atlantic calcifying plankton to climate change. *Nature Climate Change*, 3(3), 263–267.  
392 <https://doi.org/10.1038/nclimate1753>
- 393 Beszczynska-Möller, A., Fahrbach, E., Shauer, U., & Hansen, E. (2012). Variability in Atlantic water  
394 temperature and transport at the entrance to the Arctic Ocean, 1997–2010. *ICES Journal of*  
395 *Marine Science*, 69(5), 852–863. <https://doi.org/10.1038/278097a0>
- 396 Bianchi, D., Stock, C., Galbraith, E. D., & Sarmiento, J. L. (2013). Diel vertical migration: Ecological  
397 controls and impacts on the biological pump in a one-dimensional ocean model. *Global*  
398 *Biogeochemical Cycles*, 27(2), 478–491. <https://doi.org/10.1002/gbc.20031>
- 399 Bluhm, B. A., Kosobokova, K. N., & Carmack, E. C. (2015). A tale of two basins: An integrated  
400 physical and biological perspective of the deep Arctic Ocean. *Progress in Oceanography*,  
401 139(August), 89–121. <https://doi.org/10.1016/j.pocean.2015.07.011>
- 402 Box, J. E., Colgan, W. T., Christensen, T. R., Schmidt, N. M., Lund, M., Parmentier, F.-J. W., Brown,  
403 R., Bhatt, U. S., Euskirchen, E. S., Romanovsky, V. E., Walsh, J. E., Overland, J. E., Wang, M.,  
404 Corell, R. W., Meier, W. N., Wouters, B., Mernild, S., Mård, J., Pawlak, J., & Olsen, M. S.  
405 (2019). Key indicators of Arctic climate change: 1971–2017. *Environmental Research Letters*,  
406 14(4), 045010. <https://doi.org/10.1088/1748-9326/aafc1b>
- 407 Brummer, G. J., & Kroon, D. (1988). *Planktonic foraminifers as tracers of cean-climate history*. VU  
408 Uitgeverij.
- 409 Carstens, J., Hebbeln, D., & Wefer, G. (1997). Distribution of planktic foraminifera at the ice margin

- 410 in the Arctic (Fram Strait). *Marine Micropaleontology*, 29(3–4), 257–269.  
411 [https://doi.org/10.1016/S0377-8398\(96\)00014-X](https://doi.org/10.1016/S0377-8398(96)00014-X)
- 412 Carstens, J., & Wefer, G. (1992). Recent distribution of planktonic foraminifera in the Nansen Basin,  
413 Arctic Ocean. *Deep Sea Research Part A, Oceanographic Research Papers*, 39(2 PART 1), 507–  
414 524. [https://doi.org/10.1016/S0198-0149\(06\)80018-X](https://doi.org/10.1016/S0198-0149(06)80018-X)
- 415 Clarke, K. R., & Ainsworth, M. (1993). A method of linking multivariate community structure to  
416 environmental variables. *Marine Ecology Progress Series*, 92(3), 205–219.  
417 <https://doi.org/10.3354/meps092205>
- 418 Darling, K. F., Kucera, M., Kroon, D., & Wade, C. M. (2006). A resolution for the coiling direction  
419 paradox in *Neogloboquadrina pachyderma*. *Paleoceanography*, 21(2), 1–14.  
420 <https://doi.org/10.1029/2005PA001189>
- 421 Dobson, A. J. (2002). An introduction to generalized linear models. In *Chapman & Hall/Crc* (2nd ed.).  
422 Chapman & Hall/Crc. <https://doi.org/10.1198/tech.2002.s91>
- 423 Dornelas, M., Antão, L. H., Moyes, F., Bates, A. E., Magurran, A. E., Adam, D., Akhmetzhanova, A.  
424 A., Appeltans, W., Arcos, J. M., Arnold, H., Ayyappan, N., Badihi, G., Baird, A. H., Barbosa,  
425 M., Barreto, T. E., Bässler, C., Bellgrove, A., Belmaker, J., Benedetti-Cecchi, L., ... Zettler, M.  
426 L. (2018). BioTIME: A database of biodiversity time series for the Anthropocene. *Global*  
427 *Ecology and Biogeography*, 27(7), 760–786. <https://doi.org/10.1111/geb.12729>
- 428 Fadeev, E., Salter, I., Schourup-Kristensen, V., Nöthig, E.-M., Metfies, K., Engel, A., Piontek, J.,  
429 Boetius, A., & Bienhold, C. (2018). Microbial communities in the East and West Fram Strait  
430 during sea-ice melting season. *Frontiers in Marine Science*, 5, 1–21.  
431 <https://doi.org/10.3389/fmars.2018.00429>
- 432 Fenton, I. S., Pearson, P. N., Jones, T. D., & Purvis, A. (2016). Environmental predictors of diversity  
433 in recent planktonic foraminifera as recorded in marine sediments. *PLoS ONE*, 11(11), 1–22.  
434 <https://doi.org/10.1371/journal.pone.0165522>
- 435 Fetterer, F., Knowles, K., Meier, W. N., Savoie, M., & Windnagel, A. K. (2017). *Sea Ice Index*,  
436 *Version 3.0 [Arctic subset]*. Boulder, Colorado USA. NSIDC: National Snow and Ice Data  
437 Center. doi: <https://doi.org/10.7265/N5K072F8>.
- 438 Gluchowska, M., Kwasniewski, S., Prominska, A., Olszewska, A., Goszczko, I., Falk-Petersen, S.,  
439 Hop, H., & Weslawski, J. M. (2016). Zooplankton in Svalbard fjords on the Atlantic–Arctic  
440 boundary. *Polar Biology*, 39(10), 1785–1802. <https://doi.org/10.1007/s00300-016-1991-1>
- 441 Gluchowska, M., Trudnowska, E., Goszczko, I., Kubiszyn, A. M., Blachowiak-Samolyk, K.,  
442 Walczowski, W., & Kwasniewski, S. (2017). Variations in the structural and functional diversity

- 443 of zooplankton over vertical and horizontal environmental gradients en route to the Arctic Ocean  
444 through the Fram Strait. *PLoS ONE*, *12*(2), 1–26. <https://doi.org/10.1371/journal.pone.0171715>
- 445 Good, S. A., Martin, M. J., & Rayner, N. A. (2013). EN4: Quality controlled ocean temperature and  
446 salinity profiles and monthly objective analyses with uncertainty estimates. *Journal of*  
447 *Geophysical Research: Oceans*, *118*(12), 6704–6716. <https://doi.org/10.1002/2013JC009067>
- 448 Greco, M., Jonkers, L., Kretschmer, K., Bijma, J., & Kucera, M. (2019). Depth habitat of the  
449 planktonic foraminifera *Neogloboquadrina pachyderma* in the northern high latitudes explained  
450 by sea-ice and chlorophyll concentrations. *Biogeosciences*, *16*, 3425–3437.  
451 <https://doi.org/10.5194/bg-2019-79>
- 452 Greco, M., Morard, R., & Kucera, M. (2021). Single-cell metabarcoding reveals biotic interactions of  
453 the Arctic calcifier *Neogloboquadrina pachyderma* with the eukaryotic pelagic community .  
454 *Journal of Plankton Research*, *43*(2), 113–125. <https://doi.org/10.1093/plankt/fbab015>
- 455 Griffith, G. P., Hop, H., Vihtakari, M., Wold, A., Kalhagen, K., & Gabrielsen, G. W. (2019).  
456 Ecological resilience of Arctic marine food webs to climate change. *Nature Climate Change*,  
457 *9*(11), 868–872. <https://doi.org/10.1038/s41558-019-0601-y>
- 458 Guarino, M. V., Sime, L. C., Schröder, D., Malmierca-Vallet, I., Rosenblum, E., Ringer, M., Ridley,  
459 J., Feltham, D., Bitz, C., Steig, E. J., Wolff, E., Stroeve, J., & Sellar, A. (2020). Sea-ice-free  
460 Arctic during the Last Interglacial supports fast future loss. *Nature Climate Change*, *10*(10),  
461 928–932. <https://doi.org/10.1038/s41558-020-0865-2>
- 462 Hemleben, C., Spindler, M., & Anderson, O. R. (1989). *Modern Planktonic Foraminifera*. Springer.
- 463 Jonkers, L., Hillebrand, H., & Kucera, M. (2019). Global change drives modern plankton communities  
464 away from the pre-industrial state. *Nature*, *570*, 372–375. [https://doi.org/10.1038/s41586-019-](https://doi.org/10.1038/s41586-019-1230-3)  
465 1230-3
- 466 Jonkers, L., Meilland, J., Rillo, M. C., Kitchener, J. A., & Kucera, M. (2021). Linking zooplankton  
467 time series to the fossil record. *ICES Journal of Marine Science*.  
468 <https://doi.org/10.1093/icesjms/fsab123>
- 469 Jorda, G., Marbà, N., Bennett, S., Santana-Garcon, J., Agusti, S., & Duarte, C. M. (2020). Ocean  
470 warming compresses the three-dimensional habitat of marine life. *Nature Ecology and Evolution*,  
471 *4*(1), 109–114. <https://doi.org/10.1038/s41559-019-1058-0>
- 472 Khon, V. C., Mokhov, I. I., & Semenov, V. A. (2017). Transit navigation through northern sea route  
473 from satellite data and CMIP5 simulations. *Environmental Research Letters*, *12*(2).  
474 <https://doi.org/10.1088/1748-9326/aa5841>
- 475 Knutsen, T., Wiebe, P. H., Gjørseter, H., Ingvaldsen, R. B., & Lien, G. (2017). High Latitude

- 476 Epipelagic and mesopelagic scattering layers-a reference for future Arctic ecosystem change.  
477 *Frontiers in Marine Science*, 4(NOV), 1–21. <https://doi.org/10.3389/fmars.2017.00334>
- 478 Kortsch, S., Primicerio, R., Fossheim, M., Dolgov, A. V., & Aschan, M. (2015). Climate change alters  
479 the structure of arctic marine food webs due to poleward shifts of boreal generalists. *Proceedings*  
480 *of the Royal Society B*, 282(20151546), 1–9. <https://doi.org/10.5061/dryad.73r6j>
- 481 Kosobokova, K., & Hirche, H. J. (2009). Biomass of zooplankton in the eastern Arctic Ocean - A base  
482 line study. *Progress in Oceanography*, 82(4), 265–280.  
483 <https://doi.org/10.1016/j.pocean.2009.07.006>
- 484 Kosobokova, K. N., Hopcroft, R. R., & Hirche, H. J. (2011). Patterns of zooplankton diversity through  
485 the depths of the Arctic's central basins. *Marine Biodiversity*, 41(1), 29–50.  
486 <https://doi.org/10.1007/s12526-010-0057-9>
- 487 Kraft, A., Nöthig, E. M., Bauerfeind, E., Wildish, D. J., Pohle, G. W., Bathmann, U. V., Beszczynska-  
488 Möller, A., & Klages, M. (2013). First evidence of reproductive success in a southern invader  
489 indicates possible community shifts among Arctic zooplankton. *Marine Ecology Progress Series*,  
490 493, 291–296. <https://doi.org/10.3354/meps10507>
- 491 Kwok, R., Maslowski, W., & Laxon, S. W. (2005). On large outflows of Arctic sea ice into the  
492 Barents Sea. *Geophysical Research Letters*, 32(22), 1–5. <https://doi.org/10.1029/2005GL024485>
- 493 Lewis, K. L., van Dijken, G. ., & Arrigo, K. R. (2020). Changes in phytoplankton concentration, not  
494 sea ice, now drive increased Arctic Ocean primary production. *Science*, 202(July), 198–202.
- 495 Manno, C., & Pavlov, A. K. (2014). Living planktonic foraminifera in the Fram Strait (Arctic):  
496 Absence of diel vertical migration during the midnight sun. *Hydrobiologia*, 721(1), 285–295.  
497 <https://doi.org/10.1007/s10750-013-1669-4>
- 498 Morey, A. E., Mix, A. C., & Pisias, N. G. (2005). Planktonic foraminiferal assemblages preserved in  
499 surface sediments correspond to multiple environment variables. *Quaternary Science Reviews*,  
500 24(7-9 SPEC. ISS.), 925–950. <https://doi.org/10.1016/j.quascirev.2003.09.011>
- 501 Ofstad, S., Meilland, J., Zamelczyk, K., Chierici, M., Fransson, A., Gründger, F., & Rasmussen, T. L.  
502 (2020). Development, Productivity, and Seasonality of Living Planktonic Foraminiferal Faunas  
503 and *Limacina helicina* in an Area of Intense Methane Seepage in the Barents Sea. *Journal of*  
504 *Geophysical Research: Biogeosciences*, 125(2), 1–24. <https://doi.org/10.1029/2019JG005387>
- 505 Oksanen, J., Blanchet, F. G., Friendly, M., Kindt, R., Legendre, P., Mcglinn, D., Minchin, P. R., Hara,  
506 R. B. O., Simpson, G. L., Solymos, P., Stevens, M. H. H., & Szoecs, E. (2018). vegan:  
507 Community Ecology Package, R package version (Version 2.5-2). In [http://CRAN.R-](http://CRAN.R-project.org/package=vegan)  
508 [project.org/package=vegan](http://CRAN.R-project.org/package=vegan).

- 509 Onarheim, I. H., Smedsrud, L. H., Ingvaldsen, R. B., & Nilsen, F. (2014). Loss of sea ice during  
510 winter north of Svalbard. *Tellus, Series A: Dynamic Meteorology and Oceanography*, *66*(1), 1–9.  
511 <https://doi.org/10.3402/tellusa.v66.23933>
- 512 Oziel, L., Baudena, A., Ardyna, M., Massicotte, P., Randelhoff, A., Sallée, J., Ingvaldsen, R. B.,  
513 Devred, E., & Babin, M. (2020). Faster Atlantic currents drive poleward expansion of temperate  
514 phytoplankton in the Arctic Ocean. *Nature Communications*, *11*(1705), 1–8.  
515 <https://doi.org/10.1038/s41467-020-15485-5>
- 516 Pados, T., Spielhagen, R. F., Bauch, D., Meyer, H., & Segl, M. (2015). Oxygen and carbon isotope  
517 composition of modern planktic foraminifera and near-surface waters in the Fram Strait (Arctic  
518 Ocean) &ndash; A case study. *Biogeosciences*, *12*(6), 1733–1752. [https://doi.org/10.5194/bg-12-](https://doi.org/10.5194/bg-12-1733-2015)  
519 [1733-2015](https://doi.org/10.5194/bg-12-1733-2015)
- 520 Pados, Theodora, & Spielhagen, R. F. (2014). Species distribution and depth habitat of recent planktic  
521 foraminifera in Fram Strait, Arctic Ocean. *Polar Research*, *33*, 22483.  
522 <https://doi.org/10.3402/polar.v33.22483>
- 523 Polyakov, I. V., Pnyushkov, A. V., & Timokhov, L. A. (2012). Warming of the intermediate Atlantic  
524 water of the Arctic ocean in the 2000S. *Journal of Climate*, *25*(23), 8362–8370.  
525 <https://doi.org/10.1175/JCLI-D-12-00266.1>
- 526 R Core Team. (2017). R: A Language and Environment for Statistical Computing. In *R Foundation for*  
527 *Statistical Computing* (Vol. 1). <https://doi.org/10.1007/978-3-540-74686-7>
- 528 Rebotim, A., Voelker, A. H. L., Jonkers, L., Waniek, J. J., Meggers, H., Schiebel, R., Fraile, I., Schulz,  
529 M., & Kucera, M. (2017). Factors controlling the depth habitat of planktonic foraminifera in the  
530 subtropical eastern North Atlantic. *Biogeosciences*, *14*(4), 827–859. [https://doi.org/10.5194/bg-](https://doi.org/10.5194/bg-14-827-2017)  
531 [14-827-2017](https://doi.org/10.5194/bg-14-827-2017)
- 532 Reynolds, R. W., Rayner, N. A., Smith, T. M., Stokes, D. C., & Wang, W. (2002). An improved in situ  
533 and satellite SST analysis for climate. *Journal of Climate*, *15*(13), 1609–1625.  
534 [https://doi.org/10.1175/1520-0442\(2002\)015<1609:AIISAS>2.0.CO;2](https://doi.org/10.1175/1520-0442(2002)015<1609:AIISAS>2.0.CO;2)
- 535 Schiebel, R., Spielhagen, R. F., Garnier, J., Hagemann, J., Howa, H., Jentzen, A., Martínez-García, A.,  
536 Meilland, J., Michel, E., Repschläger, J., Salter, I., Yamasaki, M., & Haug, G. (2017). Modern  
537 planktic foraminifers in the high-latitude ocean. *Marine Micropaleontology*, *136*(August), 1–13.  
538 <https://doi.org/10.1016/j.marmicro.2017.08.004>
- 539 Schröter, F., Havermans, C., Kraft, A., Knüppel, N., Beszczynska-Möller, A., Bauerfeind, E., &  
540 Nöthig, E. M. (2019). Pelagic amphipods in the eastern fram strait with continuing presence of  
541 *Themisto compressa* based on sediment trap time series. *Frontiers in Marine Science*, *6*(JUN), 1–  
542 11. <https://doi.org/10.3389/fmars.2019.00311>



- 543 Simpson, G., & Chamberlain, M. S. (2018). *Package 'pangaear.'*
- 544 Simstich, J., Sarnthein, M., & Erlenkeuser, H. (2003). Paired  $\delta^{18}\text{O}$  signals of *Neogloboquadrina*  
545 *pachyderma* (s) and *Turborotalita quinqueloba* show thermal stratification structure in Nordic  
546 Seas. *Marine Micropaleontology*, 48(1–2), 107–125. [https://doi.org/10.1016/S0377-](https://doi.org/10.1016/S0377-8398(02)00165-2)  
547 8398(02)00165-2
- 548 Spielhagen, R. F., Werner, K., Sorensen, S. A., Zamelczyk, K., Kandiano, E., Gereon, B., Husum, K.,  
549 Marchitto, T. M., & Hald, M. (2011). Enhanced Modern Heat Transfer to the Arctic by Warm  
550 Atlantic Water. *Science*, 331(January), 450–453.
- 551 Volkman, R. (2000). Planktic Foraminifers in the Outer Laptev Sea and the Fram Strait--Modern  
552 Distribution and Ecology. *The Journal of Foraminiferal Research*, 30(3), 157–176.  
553 <https://doi.org/10.2113/0300157>
- 554 Wang, Y., Bi, H., Huang, H., Liu, Y., Liu, Y., Liang, X., Fu, M., & Zhang, Z. (2019). Satellite-  
555 observed trends in the Arctic sea ice concentration for the period 1979–2016. *Journal of*  
556 *Oceanology and Limnology*, 37(1), 18–37. <https://doi.org/10.1007/s00343-019-7284-0>
- 557 Wassmann, P., Kosobokova, K. N., Slagstad, D., Drinkwater, K. F., Hopcroft, R. R., Moore, S. E.,  
558 Ellingsen, I., Nelson, R. J., Carmack, E., Popova, E., & Berge, J. (2015). The contiguous  
559 domains of Arctic Ocean advection: Trails of life and death. *Progress in Oceanography*, 139,  
560 42–65. <https://doi.org/10.1016/j.pocean.2015.06.011>
- 561 Zuur, A. F., Ieno, E. N., & Smith, G. M. (2007). *Analysing Ecological Data* (1st ed.). Springer.
- 562 Zuur, A. F., Ieno, E. N., Walker, N. J., Saveliev, A. A., & Smith, G. M. (2009). *Mixed Effects Models*  
563 *and Extensions in Ecology with R*. Springer. <https://doi.org/10.1017/CBO9781107415324.004>
- 564

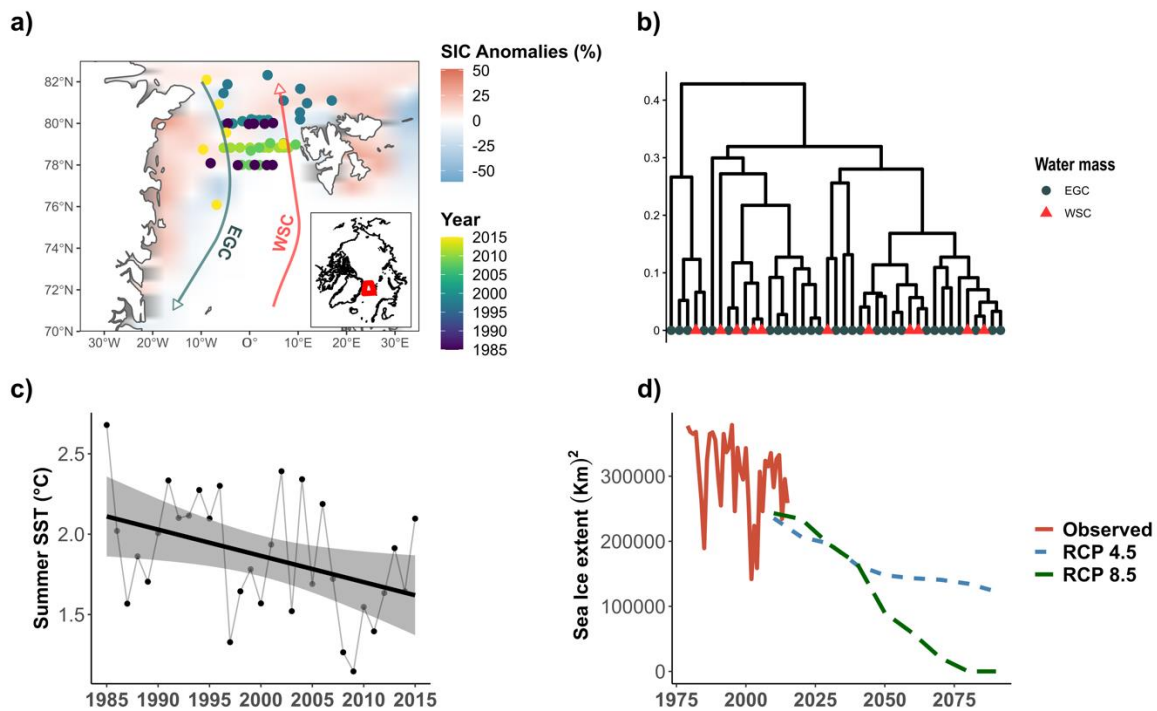

**Figure 1** a) Plankton net stations with vertically resolved planktonic foraminifera counts used in this study color-coded by year of sampling. Background colour indicates Sea Ice Anomalies (SIC) in the Fram Strait calculated for the period 1985-2015. Data from Sea Ice Index Version 3.0 (Fetterer et al., 2017). Arrows indicate the two main water masses present in the Fram Strait (East Greenland Current -EGC- and the West Spitzbergen Current -WSC-). b) Hierarchical cluster analysis showing the similarity of foraminiferal assemblages, symbols show the water mass identified with the position of the station. c) Summer SST in the sampling area in the period 1985-2015. Data from NOAA Optimum Interpolation Sea Surface Temperature V2 [weekly resolution] (Reynolds et al., 2002). d) Observational and predicted Sea-ice extent in the sampling area for the month of August from 1979 to 2090. Observational data (red line) from Sea Ice Index Version 3.0 (Fetterer et al., 2017). Model prediction for Representative concentration pathways 4.5 and 8.5 (green and blue lines respectively) based on results of Khon et al. (2017).

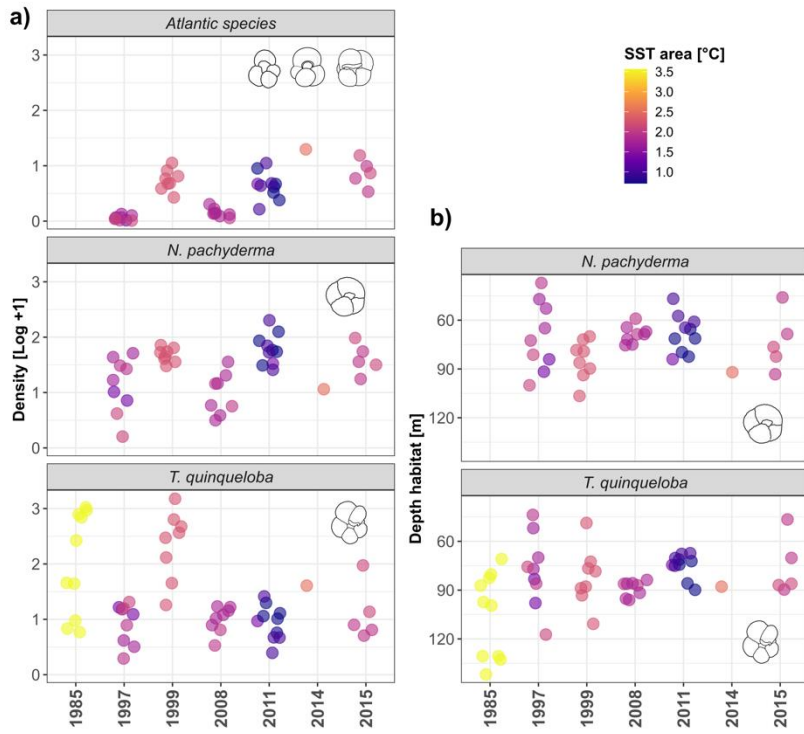

**Figure 2** a) Density and Depth habitat (b) of planktonic foraminifera species plotted against year. Colour indicates temperature of the area at the time of sampling.

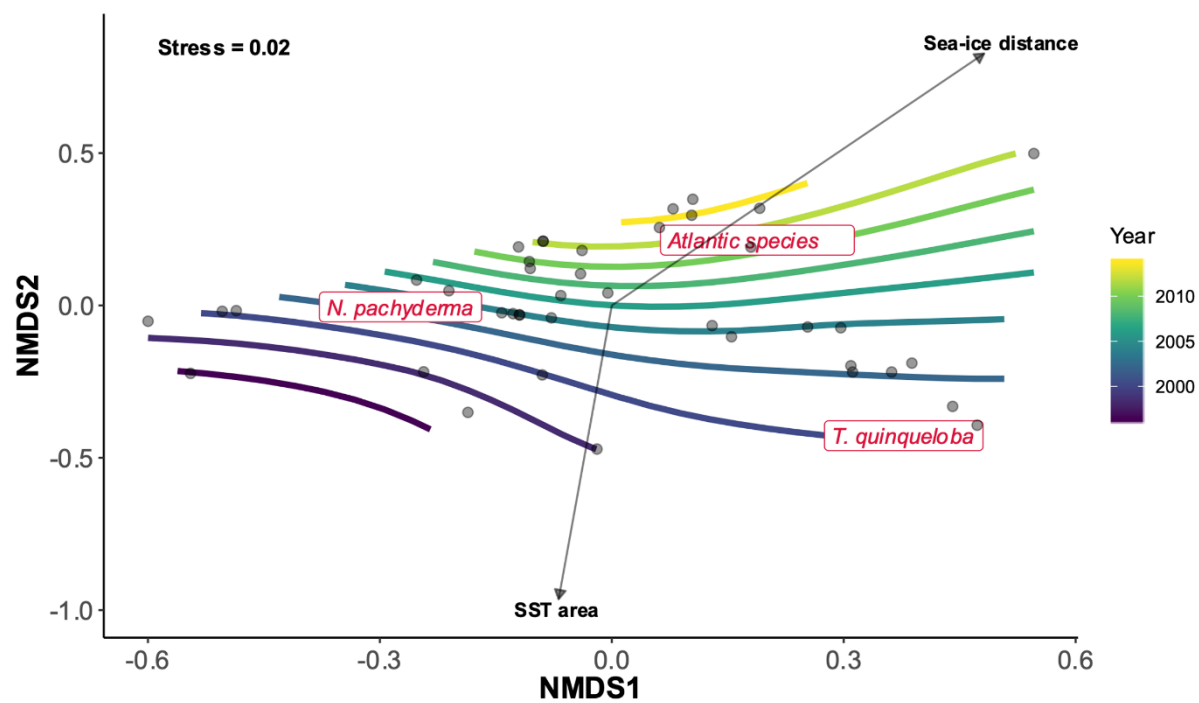

**Figure 3** NMDS ordination based on Bray-Curtis similarities Index of planktonic foraminifera abundances with fitted environmental vectors. Contour lines were derived from surface fitting (GAM) of the variable sampling year.

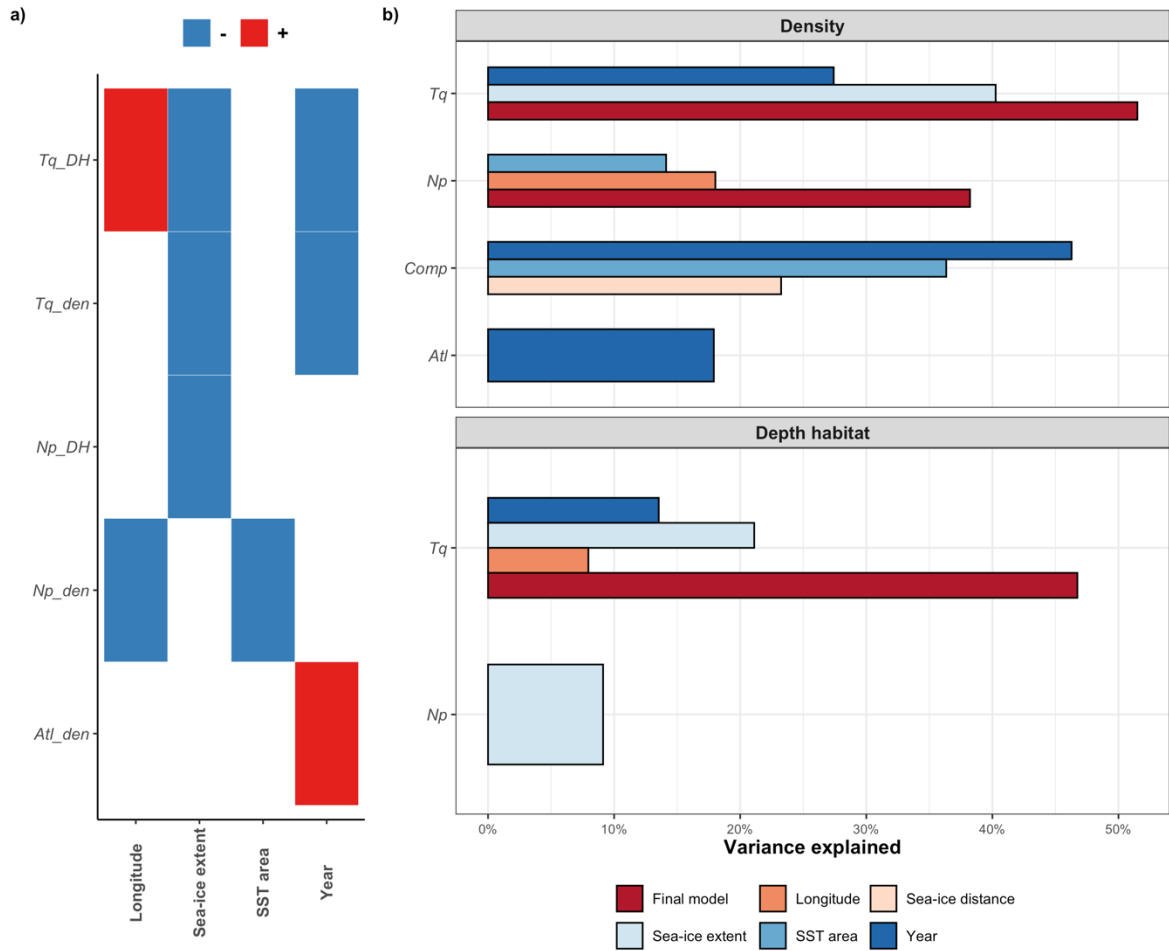

**Figure 4** a) Heat-map showing the direction of the relationship with tested environmental variables and modelled responses. b) Bar plot showing amount of variance explained by the singular predictor and the final model. (Abbreviations: Np= *Neogloboquadrina pachyderma*, Tq= *Turborotalita quinqueloba*, Atl= Atlantic species, DH= depth habitat, den= density, Comp= species composition).

|                                            | <i>p</i> - value | Pseudo / Adj. R <sup>2</sup> |
|--------------------------------------------|------------------|------------------------------|
| <b><i>N. pachyderma</i> Density</b>        |                  |                              |
| Longitude                                  | 0.01             | 18.03                        |
| SST area                                   | 0.02             | 14.12                        |
| SST area + Longitude                       |                  | 38.23                        |
| <b><i>T. quinqueloba</i> Density</b>       |                  |                              |
| Year                                       | 0                | 27.42                        |
| SST area                                   | 0                | 29.06                        |
| Sea-ice extent                             | 0                | 40.26                        |
| Year * Sea-ice extent                      |                  | 51.5                         |
| <b>Atlantic species Density</b>            |                  |                              |
| Year                                       | 0.02             | 17.91                        |
| <b><i>N. pachyderma</i> Depth habitat</b>  |                  |                              |
| Sea-ice extent                             | 0.03             | 9.13                         |
| <b><i>T. quinqueloba</i> Depth habitat</b> |                  |                              |
| Longitude                                  | 0.03             | 7.96                         |
| Latitude                                   | 0.02             | 8.53                         |
| Year                                       | 0                | 13.54                        |
| SST                                        | 0.02             | 8.4                          |
| SST area                                   | 0                | 19.14                        |
| Sea-ice concentration                      | 0.01             | 12.5                         |
| Sea-ice distance                           | 0                | 13.54                        |
| Sea-ice extent                             | 0                | 21.11                        |
| Longitude * Sea-ice extent * Year          | 0                | 46.74                        |

**Table 1** Results of the Generalised linear models and mixed linear models.
